# Supplementary material for: Non-Fatal Drowning Risk Prediction Based on Stacking Ensemble Algorithm
Source: MDPI journal article supplement (doi:10.3390/children9091383), 2022-09-14
Supplement: s1 [file s1]

We have uploaded my **survey questionnaire (in English)** and **Table S1** as supplementary file. This will help the reviewers to understand the study more quickly.

### **Child Drowning Survey**

#### **Basic information**

1. Your date of birth: YY/MM      Age:      Class:    Year    Class

2. Your gender      ① Male ② Female

3. You consider yourself to be

①Introvert - quiet, not talkative, shy, like to do things alone

②Extrovert - lively, cheerful, active and like to talk to people

③Between introvert and extrovert - between active and quiet

④ Don't know

4. How do you think of your own curiosity?

① Very strong    ② Strong    ③ Not strong    ④ Not strong at all

5. How is your relationship with your classmates?

① Very well    ② Somewhat well    ③ Not well    ④ Not well at all

6. How is your relationship with your family?

①Very well    ②Somewhat well    ③Not well    ④Not well at all

7. How many siblings are in your family (including yourself)?

① 1    ② 2    ③ 3    ④ 4 or more

8. What is your family ranking?

## **Drowning-related knowledge and behaviour**

1. "Drowning is the leading cause of injury deaths among children and youth",  
is this correct?

- ① Correct    ② Incorrect    ③ Don't know

2. Do you think drowning among children and youth can be prevented?

- ① Yes    ② No

3. Which of the following diseases do you think makes drowning easier when  
swimming?

- ① Heart disease    ② Skin disease    ③ Otitis media    ④ Myopia

4. What is the best way to escape if the car you are in falls into the water?

- ① Turn on all the lights and wait for help.
- ② Break the windows and get out immediately.
- ③ Wait until the pressure inside and outside the windows is  
approximately equal, then open the windows and doors to  
escape.
- ④ Don't know what to do

5. Two minutes after drowning, people will be unconscious. How many  
minutes does the nervous system suffer irreversible damage?

- ① 4 to 6    ② 7 to 10    ③ 11 to 15    ④ Don't know

6. What do you think is the main function of inflatable swimming rings?

① Life-saving    ② Play    ③ Learn to swim    ④ Don't know

7. What is the ratio of the frequency of cardiac compressions to the number of artificial breaths during CPR in children? ① 5:1    ② 15:2    ③ 30:2    ④ Don't know

8. Would you still play or swim at the edge of a pond (or in a river, lake, reservoir, etc.) if there was a danger warning sign?

① Definitely    ② Probably    ③ Probably not    ④ Definitely not

9. Is open water near your home or school well protected, e.g.

a. Are all wells covered?    ① Yes    ② No    ③ No wells

b. Are all gutters fenced/covered?    ① Yes    ② No    ③ No guttering

c. Are all construction site pools emptied in a timely manner?    ① Yes    ② No    ③ No pools

d. Are all toilets/culvert pits fenced/covered?    ① Yes    ② No    ③ No cesspit

e. Are all ponds, rivers, pools, etc. around your home marked with no swimming signs?    ① Yes    ② No    ③ No streams, ponds, etc.

10. How far is your school surrounded by open water (e.g. ponds, rivers, reservoirs)?

① Within 100m    ② 101-500m    ③ Over 500m    ④ None    ⑤ Don't know

11. How far is open water (e.g. ponds, rivers, reservoirs) around your home?

① Within 100m    ② 101-500m    ③ More than 500m    ④ None    ⑤ Don't know

12. Is there any open water (e.g. ponds, rivers, reservoirs) on your way to school?

- ① Yes    ② No    ③ Don't know

13. If a friend or classmate asks you to go to a pond (or river, lake, reservoir, etc.) to play or swim without an adult, would you go?

- ① Definitely    ② Probably    ③ Probably not    ④ Definitely not

14. How good are you at swimming?

- ① Proficient (swimming more than 100m)    ② Average (swimming 50-100m)

- ③ Poor, can't swim 50m    ④ Can't swim

15. In the past 12 months, have you swum in open water (ponds, rivers, lakes, reservoirs, etc.) unaccompanied by an adult?

- ① 3 times or more/month    ② 1 to 2 times/month    ③ 1 to 2 times/quarter    ④ 1 to 2 times/year    ⑤ No

16. In the past 12 months, have you ever gone fishing (or shrimp/snail fishing) in open water alone?

- ① 3 times or more/month    ② 1 to 2 times/month    ③ 1 to 2 times/quarter    ④ 1 to 2 times/year    ⑤ No

17. In the past 12 months, did you play with your peers around the pond (other wild water, swimming pool)?

- ① 3 times or more/month    ② 1 to 2 times/month    ③ 1 to 2 times/quarter    ④ 1 to 2 times/year    ⑤ No

18. In the past 12 months, have you ever dived or jumped in open water of

unknown depth?

① 3 or more times/month ② 1 to 2 times/month ③ 1 to 2 times/quarter ④ 1 to 2 times/year ⑤ No

19. In the past 12 months, have you ever drowned?

① No ② 1 time ③ 2 times ④ 3 times ⑤ 4 times ⑥ ≥5 times

20. Do you remember the cause of your most recent drowning?

① Swimming ② Falling into the water ③ Saving someone ④ Diving or scuba diving

⑤ Attack of illness ⑥ Boat ride ⑦ Don't remember ⑧ No drowning

21. Do you remember this drowning happened in the month of

22. Do you remember the exact time of the drowning?

① Morning ② Noon ③ Afternoon ④ Evening ⑤ Don't remember ⑥ No drowning

23. Did anyone see the drowning?

① Yes ② No ③ Don't know ④ No drowning

24. Where was the drowning place?

① Bathtub ② Swimming pool ③ River/pond/reservoir ④ Well ⑤ Drain/puddle ⑥ Cesspool ⑦ Ditch/sewer ⑧ Lime pond ⑨ Don't know ⑩

No drowning

25. Did you save yourself or others after this drowning?

① Self-rescue - get to shore by yourself

② Other rescue - someone else rescued you

③ Don't know

④ Did not drown

26. When you were rescued, did you feel conscious?

① Yes ② No ③ Don't know ④ Did not drown

27. What did you do after drowning? (Fill in the most important treatment)

① No treatment ② Emergency treatment at the scene ③ Hospital outpatient (emergency) treatment ④ Hospitalization ⑤ Other ⑥ No drowning

28. What was the cost of the drowning treatment?

① No cost ② <10 ¥ ③ 10-99 ¥ ④ 100-999 ¥ ⑤ 1000-2999 ¥ ⑥ 3000-9999 ¥ ⑦ 10000-29999 ¥ ⑧ ≥30000 ¥ ⑨ Don't know ⑩ No drowning

29. In which area did you suffer a loss of function because of this drowning?

① No loss of function ② No use of hands or arms ③ Difficulty using hands or arms ④ Walking on cramped feet ⑤ Loss of hearing ⑥ Inability to chew food ⑦ Other ⑧ Refused to answer ⑨ Did not drown

**Date of survey: MM/YY**

**This is the end of the form, please check again for any errors or omissions.**

**Thank you for your cooperation!**

**Table S1.** Definitions and values of variables

| variables                            | Definitions and values                                                                   |
|--------------------------------------|------------------------------------------------------------------------------------------|
| Occurrence of drowning (y)*          | No = 0, Yes = 1                                                                          |
| Age (Years)                          | $A1b \leq 9 = 1, 10 \leq A1b \leq 14 = 2,$<br>$15 \leq A1b \leq 18 = 3.$                 |
| Grade                                | Continuous variable (From 3 to 8)                                                        |
| Gender                               | Males = 1, Females = 2                                                                   |
| Personality                          | Introvert = 1, Extrovert = 2, Between<br>introvert and extrovert = 3, Do not<br>know = 4 |
| Relationships with classmates        | Very good = 1, Good = 2, Not good =<br>3, Bad = 4                                        |
| Relationships with family            | Very good = 1, Good = 2, Not good =<br>3, Bad = 4                                        |
| Number of siblings                   | One =1, Two = 2, Three =3, Four or<br>over=4                                             |
| Home ranking                         | Frist =1, Second =2, Third=3, Do not<br>know = 9                                         |
| If there are hazard warning signs on | Yes=1, Probably=2, Probably not=3,                                                       |

ponds (or rivers, lakes, reservoirs, No=4

etc.), would you still play or swim

there?

Distance from school to open water < 100 = 1, 100–500 = 2, 500 + =3, Have  
(Meters) no water area = 4, Do not know = 5

Distance from home to open water < 100 = 1, 100–500 = 2, 500 + =3, Have  
(Meters) no water area = 4, Do not know = 5

Are there open water areas on the Yes = 1, No = 2, Do not know = 3  
way to school

Without the company of an adult, if a Yes=1, Probably=2, Probably not=3,  
friend or classmate asks you to play No=4  
or swim by the water, will you go?

Swimming level (Meters)  $\geq 100$  = 1, 50–100 = 2, < 50 = 3, Unable  
to swim =4

In the past 12 months, have you ever More than three times a month=1,  
been swimming in open water Once or twice a month=2, Once or  
without the company of an adult? twice a season=3, Once or twice a  
year=4, No=5

Whether to fish alone More than three times a month=1,  
Once or twice a month=2, Once or  
twice a season=3, Once or twice a  
year=4, No=5



|                                   |                                                                                                                           |
|-----------------------------------|---------------------------------------------------------------------------------------------------------------------------|
| Playing around the pond           | More than three times a month=1,<br>Once or twice a month=2, Once or<br>twice a season=3, Once or twice a<br>year=4, No=5 |
| Diving in waters of unknown depth | More than three times a month=1,<br>Once or twice a month=2, Once or<br>twice a season=3, Once or twice a<br>year=4, No=5 |

---

\* Occurrence of drowning: once had the experience of drowning=Yes, had on  
experience of drowning=No.
